# Supplementary material for: Characterizing Direct-to-Consumer Stem Cell Businesses in the Southwest United States
Source: PubMed Central journal article supplement (PMC6700498; doi:10.1016/j.stemcr.2019.07.001), 2019-08-01
Supplement: mmc1.pdf [file mmc1.pdf]

**Stem Cell Reports, Volume 13**

**Supplemental Information**

**Characterizing Direct-to-Consumer Stem Cell Businesses in the South-  
west United States**

**Emma K. Frow, David A. Brafman, Anna Muldoon, Logan Krum, Paige Williams, Bryson  
Becker, John P. Nelson, and Ashley Pritchett**

## Supplemental Information

**Table S1.** List of medical conditions treated with stem cells across the businesses characterized (related to Fig.1C).

| Condition Category               | Conditions included in the category |
|----------------------------------|-------------------------------------|
| Autism                           |                                     |
| Cancer                           | Breast cancer                       |
|                                  | Prostate cancer                     |
| Cardiac                          | Cardiovascular problems             |
|                                  | Chronic heart failure               |
|                                  | Ischemic cardiomyopathy             |
|                                  | Ischemic stroke                     |
|                                  | Myocardial infarction               |
|                                  | peripheral artery disease           |
| Cosmetic                         | refractory angina                   |
|                                  | anti-aging                          |
|                                  | breast augmentation                 |
|                                  | breast reconstruction               |
|                                  | buttock augmentation                |
|                                  | cutaneous photo-aging               |
|                                  | Facelift                            |
|                                  | facial rejuvenation                 |
|                                  | hair rejuvenation                   |
|                                  | Skin                                |
| Diabetes                         |                                     |
| Gastrointestinal (GI)            | Crohn's disease                     |
|                                  | ulcerative colitis                  |
| Hepatic                          | fatty liver / liver insufficiency   |
|                                  | Hepatitis                           |
|                                  | auto-immune hepatitis               |
| Inflammatory                     | SI joint inflammation               |
|                                  | Facet joint syndrome                |
| <i>(sub-category) Arthritis</i>  | basal joint arthritis               |
|                                  | carpometacarpal arthritis           |
|                                  | degenerative osteoarthritis         |
|                                  | Osteoarthritis                      |
|                                  | rheumatoid arthritis                |
|                                  | spinal arthritis                    |
| <i>(sub-category) Autoimmune</i> | sub-talar arthritis                 |
|                                  | Alopecia                            |

|                                       |                               |
|---------------------------------------|-------------------------------|
|                                       | Lupus                         |
|                                       | relapsing polychondritis      |
| Lung                                  | Asthma                        |
|                                       | COPD                          |
| Muscular dystrophy                    |                               |
| Neural                                | cognitive impairment          |
|                                       | CIDP                          |
|                                       | diabetic neuropathy           |
|                                       | Dysautonomia                  |
|                                       | myasthenia gravis             |
|                                       | occipital neuralgia           |
|                                       | optic neuritis                |
|                                       | peripheral neuropathy         |
|                                       | Radiculopathy                 |
|                                       | Sciatica                      |
|                                       | Stroke                        |
|                                       | traumatic brain injury        |
| Neurodegenerative conditions          | ALS                           |
|                                       | Alzheimer's                   |
|                                       | cerebral palsy                |
|                                       | Huntington's                  |
|                                       | Multiple sclerosis            |
|                                       | Parkinsons                    |
| Orthopedic                            | AC joint separation           |
|                                       | avascular osteonecrosis       |
|                                       | Baker's cyst                  |
|                                       | Bursitis                      |
|                                       | Bunion                        |
|                                       | carpal/tarsal tunnel syndrome |
|                                       | Dupuytren's contracture       |
|                                       | Osteoporosis                  |
|                                       | pinched nerve/radiating pain  |
|                                       | plantar fasciitis             |
|                                       | spinal muscular atrophy       |
|                                       | Spur                          |
|                                       | thoracic outlet syndrome      |
|                                       | Tumor                         |
| <i>(sub-category) Sports injuries</i> | Achilles injuries             |

|                             |                                   |
|-----------------------------|-----------------------------------|
|                             | ACL                               |
|                             | Fractures                         |
|                             | Golfer's elbow                    |
|                             | Instability                       |
|                             | Meniscus                          |
|                             | osteochondral lesions             |
|                             | patellar, patellofemoral syndrome |
|                             | post-surgery                      |
|                             | recurrent dislocations            |
|                             | rotator cuff tendonitis           |
|                             | runner's knee                     |
|                             | Scleroderma                       |
|                             | Sprains                           |
|                             | tendonitis, tendonopathy          |
|                             | tennis elbow                      |
|                             | TFCC tear                         |
|                             | trigger finger                    |
| <i>(sub-category) Spine</i> | annular tear                      |
|                             | Deformity                         |
|                             | degenerative disk disease         |
|                             | failed back surgery               |
|                             | herniated disk                    |
|                             | Scoliosis                         |
|                             | spondylosis; spondylolisthesis    |
|                             | spinal stenosis                   |
|                             | Stenosis                          |
| Pain                        | General                           |
|                             | headaches/migraines               |
|                             | post-surgery                      |
|                             | Whiplash                          |
| Urological                  | erectile dysfunction              |
|                             | interstitial cystitis             |
|                             | peyronies disease                 |
|                             | bladder conditions                |
|                             | kidney conditions                 |

**Table S2.** Comparison of number of stem cell businesses & clinics identified by Turner and Knoepfler (2016) and those identified in the current study (related to Experimental Procedures).

| State        | Current study |         | Turner & Knoepfler (2016) |         |
|--------------|---------------|---------|---------------------------|---------|
|              | Businesses    | Clinics | Businesses                | Clinics |
| Arizona      | 34            | 47      | 27                        | 36      |
| California   | 79            | 105     | 71                        | 113     |
| Colorado     | 28            | 41      | 19                        | 37      |
| New Mexico   | 6             | 8       | 1                         | 2       |
| Nevada       | 11            | 15      | 5                         | 7       |
| Utah         | 11            | 22      | 5                         | 10      |
| <b>TOTAL</b> | 169           | 238     | 128                       | 205     |

**Table S3.** Data summary for direct-to-consumer stem cell businesses in the Southwest US (related to Experimental Procedures). State locations are provided for each business, but specific business names are not identified.

See Excel file for Table S3.

## Supplemental Experimental Procedures

### Online data collection

Stem cell businesses were identified through state-by-state internet searches between June 2016 and August 2017. The list of businesses provided by Turner and Knoepfler (2016) was used to create an initial list, and was then expanded through independent searches for businesses in specific states and regions in the Southwest US. Specific search terms used are listed at the end of this document.

Information was collected from the public sections of stem cell business websites and inputted into an Excel spreadsheet. For each characterized stem cell business, screenshots were taken of each webpage that mentioned stem cells (using Snagit software), to construct an archive for future reference. After the initial data collection, a randomized 25% of the clinics characterized by each researcher was cross-checked by a different member of the research team, to ensure consistency in data collection practices across researchers. Any discrepancies in data collection were flagged and discussed collectively, and a consensus data entry agreed upon.

The data collected reflects the public presentation of a stem cell business; it is assumed to be accurate, but is not guaranteed to represent the actual practices of a given business. For example, a given clinic might not list all the conditions they treat with stem cells, or might not in practice treat all the conditions that they list online.

## **Condition Categories**

A complete list of medical conditions treated with stem cells was compiled all from stem cell business websites characterized, and the research team worked collectively to collapse this list into the 11 broad categories listed in Table S1.

## **Medical Specialties**

The care providers listed for each stem cell business were copied into the data collection spreadsheets, together with any specialty and/or board certification information listed on the business website. For any providers who did not list information regarding their professional qualifications, Google searches were undertaken to identify any specialties, board certifications, or professional association memberships. If a given practitioner made information available on a university or other clinic website, this was used. For those who did not, searches were conducted to identify available biographies from conferences, fellowships, or professional societies. If no listing for a care provider could be found or no names were provided on a clinic's website, the provider was listed as of "unknown" expertise.

Once identified, medical specialties were grouped into related categories for analysis (see Fig. 3B). Some specialties were combined for brevity. For example, "anti-aging," "anti-aging and cosmetic medicine," and "cosmetic medicine" were combined into "anti-aging and cosmetic medicine". "General practice" and "general medicine" were combined into "general practice."

## **Stem Cell Business Search Terms**

Stem cell clinics Arizona  
Stem cell treatment clinic Southern California  
Northern California stem cell treatment center  
Norcal regenerative cell treatment  
Bay Area stem cell treatment center  
Colorado stem cell clinics  
Stem cell clinics AND New Mexico  
Stem cell clinics and NM  
Stem cell clinics in New Mexico  
Adipose tissue AND New Mexico  
Stem cell clinics Nevada  
Stem cell clinics of Nevada  
Small stem cell clinics in Nevada  
Stem cell clinics Utah  
Health AND stem cells
